# Supplementary material for: SMRT-Cappable-seq reveals complex operon variants in bacteria
Source: PubMed Central journal article supplement (PMC6131387; doi:10.1038/s41467-018-05997-6), 2018-09-10
Supplement: 41467_2018_5997_MOESM3_ESM.pdf [file 41467_2018_5997_MOESM3_ESM.pdf]

## Description of Additional Supplementary Files

File Name: Supplementary Data 1

Description: TTSs defined by SMRT-Cappable-seq under M9 and Rich condition.

Column 1: Genome version.

Column 2 : TSS for forward strand OR TTS for reverse strand.

Column 3: TSS for reverse strand OR TTS for forward strand.

Column 4: Strand.

Column 5: The number of reads starting at the TSS position.

Column 6: The number of reads starting at the TSS and ending at the TTS.

Column 7: The number of reads starting at the TSS but passing through the TTS (which means ending at least 50 bp downstream of the TTS).

Column 8: The number of reads starting at the TSS and ending within the region 50 bp downstream of the TTS.

Column 9: Median size of the 3' extended region (bp).

Column 10: TTS types (novel TTS, known terminator or known attenuator).

Column 11: Name of the nearest known terminator.

Column 12: The position of the known terminator (center).

Column 13 : List of genes fully covered by the transcript (separated by |).

File Name: Supplementary Data 2

Description: SMRT-Cappable-seq operons.

Column 1: List of genes (separated by |) in the SMRT-Cappable-seq defined operon.

Column 2: Transcription start site of the SMRT-Cappable-seq operon.

Column 3: Operon strand.

Column 4: Comparison with RegulonDB. See Supplementary Notes for details.

Column 5: List of previously annotated RegulonDB operons that overlap with the SMRT-Cappable-seq operon (Separated by semi-colon) .

File Name: Supplementary Data 3

Description: RegulonDB operons extended by SMRT-Cappable-seq.

Column 1: List of genes in RegulonDB annotated operons (separated by |).

Column 2: List of genes contained by SMRT-Cappable-seq transcripts (separated by |).

File Name: Supplementary Data 4

Description: Transcriptional Context (TC).

Column 1: Gene ID.

Column 2: The number of TC that the gene is found in under M9 condition.

Column 3: The number of TC that the gene is found in under Rich condition.
